# Supplementary material for: Chemo-mechanical changes of low-pH concrete under deep geological repository- like conditions: coupled biotic and abiotic effects
Source: Research Square preprint supplement (doi:10.21203/rs.3.rs-7938392/v1), 2025-11-18
Supplement: Supplementary file 1 [file 298b8204f060a7a3f168bfcd.docx]

# Supplementary information

Table S1: Top ten of upregulation and downregulation pathways across the three interfaces.

| **BCV interface** | | | | | | | |
| --- | --- | --- | --- | --- | --- | --- | --- |
| **Upregulation pathway** | **basemean** | **log2FC** | **padj** | **Downregulation pathway** | **basemean** | **log2FC** | **Padj** |
| glucose degradation (oxidative) | 4101.104 | 4.75626 | 3.05E-09 | p-cymene degradation | 217.4583 | -28.153 | 2.933604 |
| ketogluconate metabolism | 5192.127 | 2.46243 | 7.06E-11 | p-cumate degradation | 217.4583 | -28.153 | 2.933604 |
| CMP-legionaminate biosynthesis I | 5514.551 | 2.44556 | 4.70E-12 | &beta_-alanine biosynthesis II | 73.31401 | -4.6796 | 1.302527 |
| L-arabinose degradation IV | 4700.789 | 2.35996 | 7.73E-05 | 3-hydroxypropanoate cycle | 59.15507 | -4.2442 | 1.624932 |
| gallate degradation I | 4301.397 | 2.11214 | 2.73E-06 | chlorosalicylate degradation | 1182.164 | -4.2308 | 0.881622 |
| syringate degradation | 7055.666 | 1.94694 | 0.040525 | glyoxylate assimilation | 55.16025 | -4.1605 | 1.622223 |
| nitrate reduction I (denitrification) | 7867.676 | 1.83517 | 0.000199 | superpathway of the 3-hydroxypropanoate cycle | 77.58969 | -4.1356 | 1.651202 |
| benzoyl-CoA degradation I (aerobic) | 2197.01 | 1.53535 | 0.014234 | phosphopantothenate biosynthesis III | 6.569433 | -3.5422 | 1.590346 |
| gallate degradation II | 5797.803 | 1.51431 | 0.000133 | aerobactin biosynthesis | 168.8983 | -3.5284 | 0.753011 |
| superpathway of &beta_-D-glucuronide and D-glucuronate degradation | 6735.027 | 1.4346 | 7.10E-08 | nicotinate degradation I | 519.9932 | -3.1834 | 0.554269 |
| methylgallate degradation | 6471.186 | 1.3941 | 0.000199 | superpathway of L-arginine, putrescine, and 4-aminobutanoate degradation | 1080.342 | -3.0999 | 0.578128 |
| **Air interface** | | | | | | | |
| **Upregulation pathway** | **basemean** | **log2FC** | **padj** | **Downregulation pathway** | **basemean** | **log2FC** | **padj** |
| dTDP-6-deoxy-&alpha_-D-allose biosynthesis | 9.375411 | 23.3558 | 7.39E-13 | L-1,2-propanediol degradation | 1395.223 | -4.6365 | 0.01358 |
| tylosin biosynthesis | 4.916882 | 22.4678 | 4.17E-12 | gallate degradation I | 1663.041 | -1.4903 | 0.02471 |
|  |  |  |  | gallate degradation II | 1830.091 | -1.2236 | 0.04593 |
|  |  |  |  | methylgallate degradation | 2245.798 | -1.2114 | 0.04593 |
| **Water interface** | | | | | | | |
| **Upregulation pathway** | **basemean** | **log2FC** | **padj** | **Downregulation pathway** | **basemean** | **log2FC** | **padj** |
| flavin biosynthesis II (archaea) | 168.9404 | 2.27112 | 3.62E-32 | L-valine degradation I | 355.1172 | -5.1075 | 1.71E-09 |
| phosphopantothenate biosynthesis III | 107.9218 | 2.08838 | 5.00E-36 | pyruvate fermentation to butanoate | 3117.906 | -3.3652 | 0.000388 |
| chorismate biosynthesis II (archaea) | 46.18544 | 2.07845 | 1.45E-33 | thiazole biosynthesis II (Bacillus) | 2220.335 | -3.213 | 0.000581 |
| superpathway of mycolyl-arabinogalactan-peptidoglycan complex biosynthesis | 29.52024 | 2.93477 | 6.47E-16 | superpathway of Clostridium acetobutylicum acidogenic fermentation | 3402.996 | -3.1602 | 0.000819 |
| mevalonate pathway II (archaea) | 57.2286 | 2.10451 | 1.28E-29 | creatinine degradation II | 1677.736 | -2.8257 | 0.034207 |
| methanogenesis from H2 and CO2 | 12.55734 | 2.55837 | 2.39E-19 | creatinine degradation I | 2381.05 | -2.4794 | 0.001076 |
| pyrimidine deoxyribonucleotides de novo biosynthesis IV | 105.7587 | 2.04795 | 2.99E-05 | purine nucleobases degradation I (anaerobic) | 7822.631 | -2.329 | 0.016281 |
| superpathway of L-threonine metabolism | 46.76207 | 1.80223 | 1.16E-06 | nitrate reduction VI (assimilatory) | 1587.989 | -2.1716 | 0.000904 |
| pyrimidine deoxyribonucleotides biosynthesis from CTP | 150.5273 | 1.92436 | 1.87E-05 | superpathway of thiamin diphosphate biosynthesis II | 4533.779 | -1.9515 | 0.018244 |
| L-arabinose degradation IV | 3405.291 | 1.46711 | 2.52E-07 | catechol degradation to 2-oxopent-4-enoate II | 1582.978 | -1.8183 | 0.001004 |
| mannosylglycerate biosynthesis I | 26.48699 | 2.06699 | 0.001791 | D-glucarate degradation I | 1177.454 | -1.5044 | 0.014439 |

Table S2: Uniaxial compressive strength of reference 15 cm - cubes (MPa).

| Sample age (months) | 0.9 | 2.0 | 3.0 | 5.8 | 36 (T0) | 60 (T4) |
| --- | --- | --- | --- | --- | --- | --- |
| Average value (MPa) | 47.6* | 50.8* | 52.3* | 53.5** | 64.5 | 54.4 |

*Pernicová et al., 2019; **Čítek et al., 2020


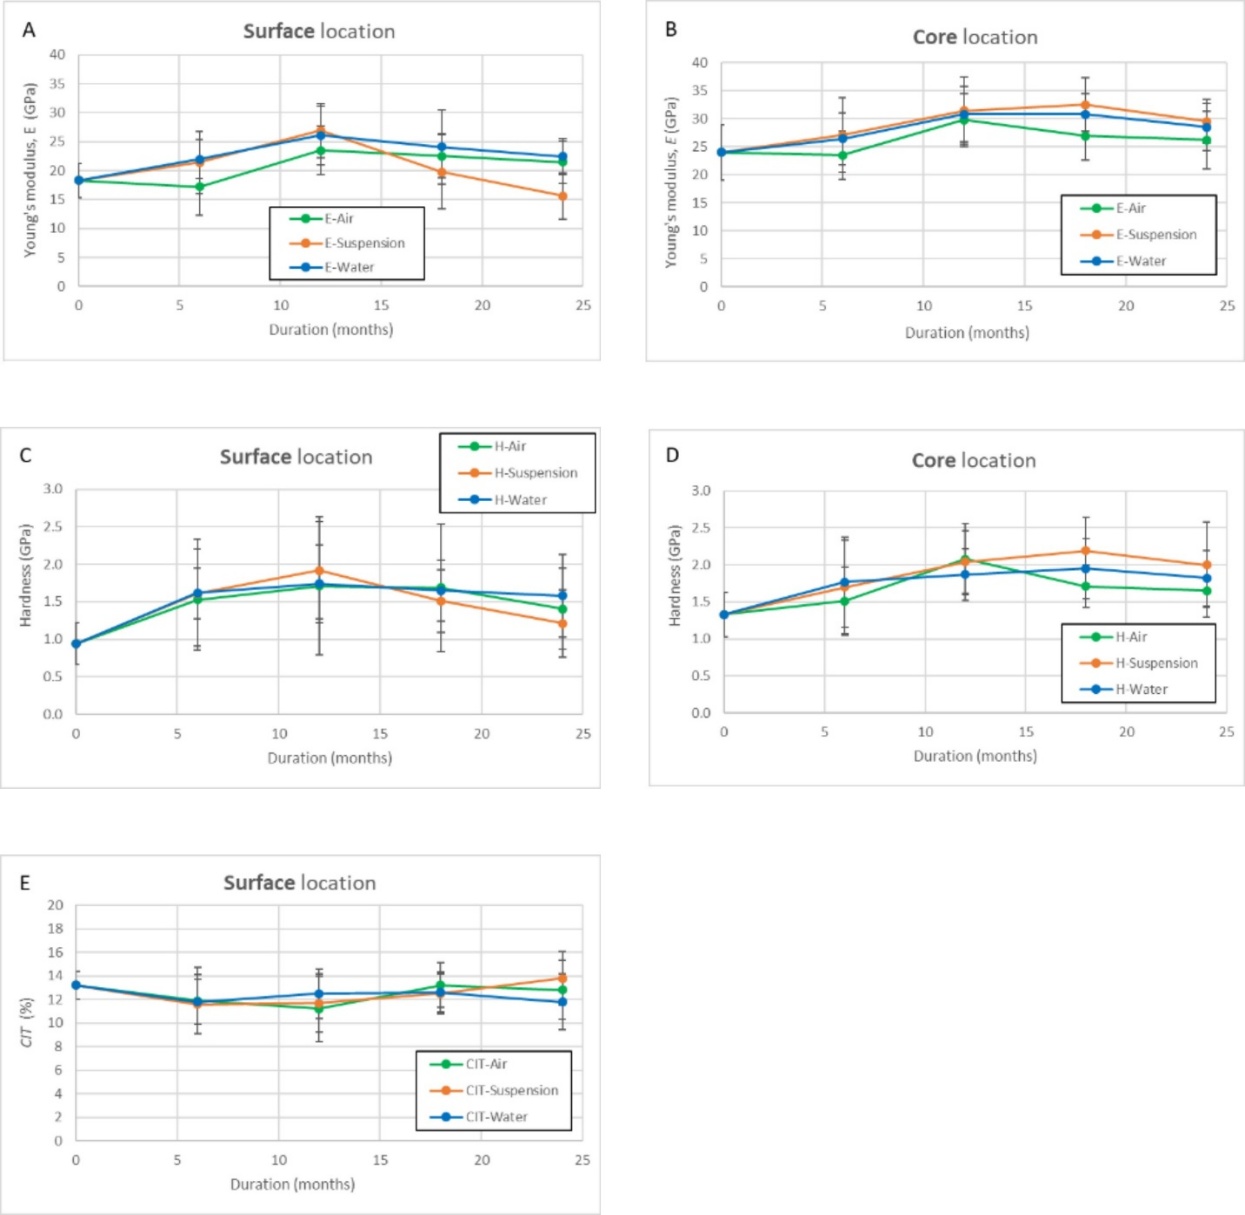


Fig. S1: Nanoindentation results of LPC samples. (A, C) Young’s modulus and hardness of the surface layer, respectively. (B, D) Young’s modulus and hardness of the core, respectively. (E) Creep indentation parameter (CIT) of the samples.


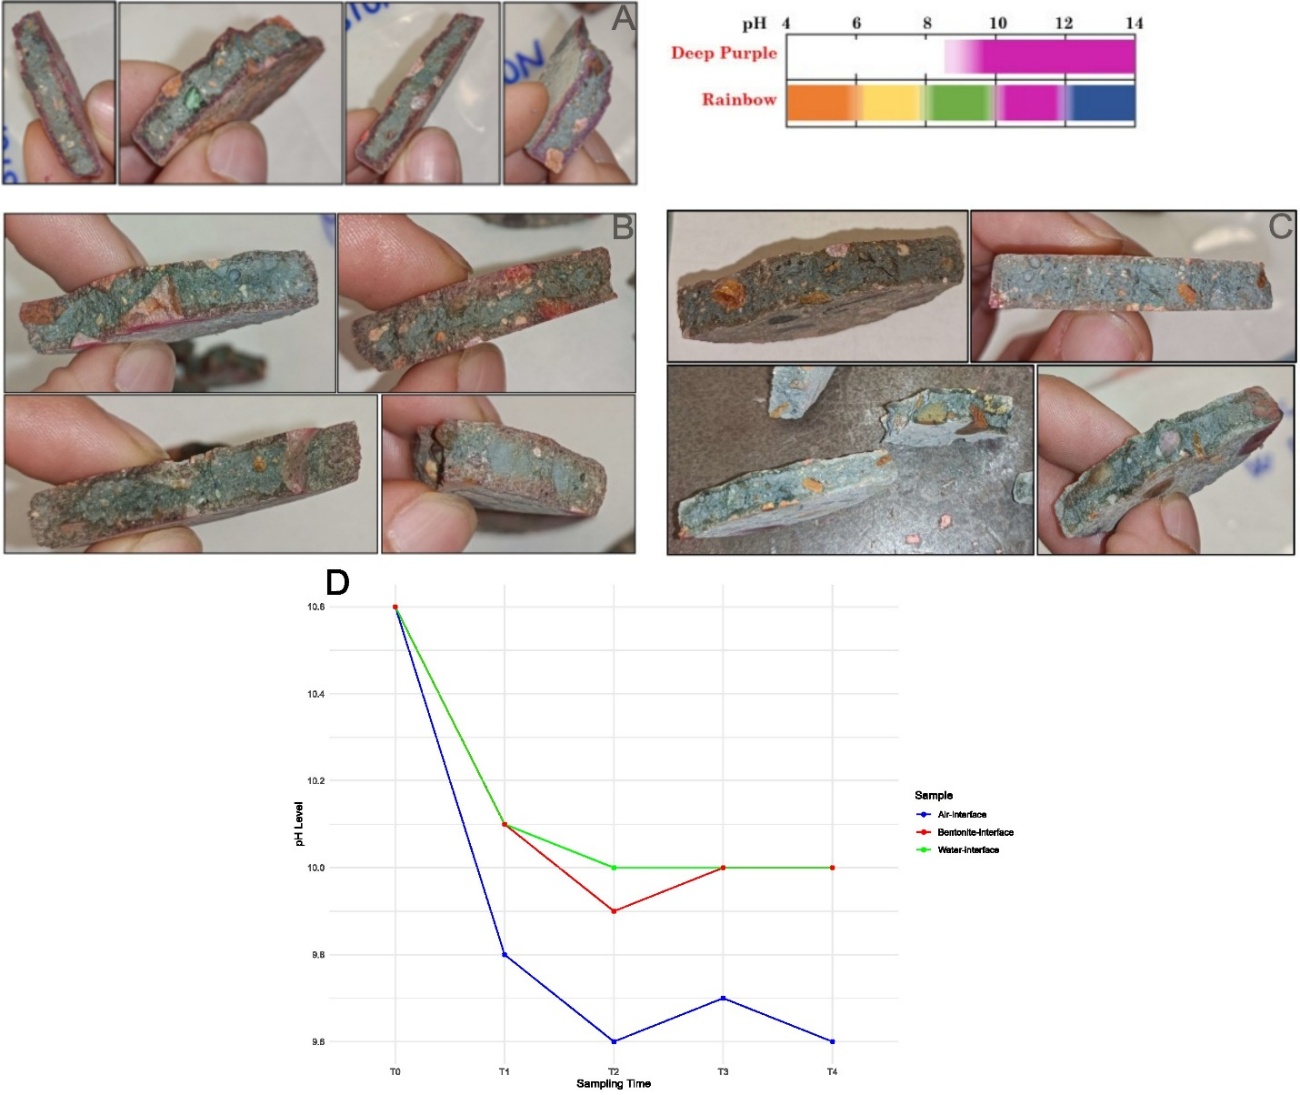


**Fig. S2:** pH evolution of LPC across the three interfaces. (A–C) pH distribution at T3 determined using rainbow indicators for A) BCV interface, B) air interface, and C) water interface (Vidal et al, 2024). D) Temporal pH changes from T0 to T4 across the three interfaces.
